# Supplementary material for: Explorations of new UV nonlinear optical materials in the Na2CO3–CaCO3system
Source: Royal Society of Chemistry journal article supplement (doi:10.1039/c7tc02789c), 2017-01-01
Supplement: c7tc02789c1.pdf [file c7tc02789c1.pdf]

## Electronic Supplementary Information

Yunxia Song,<sup>a,b</sup> Min Luo,<sup>a,\*</sup> Dan Zhao,<sup>c</sup> Guang Peng,<sup>a,b</sup> Chensheng Lin,<sup>a</sup> and Ning

Ye<sup>a,\*</sup>

*a. Key Laboratory of Optoelectronic Materials Chemistry and Physics, Fujian Institute of Research on the Structure of Matter, Chinese Academy of Sciences, Fuzhou, Fujian, 350002, P. R. China*

*b. University of Chinese Academy of Sciences, Beijing 100049, P. R. China*

*c. Department of Physics and Chemistry, Henan Polytechnic University, Jiaozuo, Henan 454000, China*

Email: [lm8901@fjirsm.ac.cn](mailto:lm8901@fjirsm.ac.cn)  
[nye@fjirsm.ac.cn](mailto:nye@fjirsm.ac.cn)

Table S1. Atomic coordinates ( $\times 10^4$ ) and equivalent isotropic displacement parameters ( $\text{\AA}^2 \times 10^3$ ) for  $\text{Na}_6\text{Ca}_5(\text{CO}_3)_8$ .  $U(\text{eq})$  is defined as one third of the trace of the orthogonalized  $U_{ij}$  tensor.

| atom  | x         | Y         | z        | $U_{\text{eq}}(\text{\AA}^2)$ |
|-------|-----------|-----------|----------|-------------------------------|
| Ca(1) | 10000     | 10000     | 6379(4)  | 20(1)                         |
| Ca(2) | 11483(3)  | 8517(3)   | 4587(5)  | 49(1)                         |
| Na(2) | 11483(3)  | 8517(3)   | 4587(5)  | 49(1)                         |
| Ca(3) | 9944(2)   | 4972(1)   | 5739(3)  | 21(1)                         |
| Na(1) | 11843(2)  | 8157(2)   | 7512(3)  | 5(1)                          |
| Na(3) | 13333     | 6667      | 3293(15) | 95(5)                         |
| C(1)  | 13333     | 6667      | 5676(17) | 21(4)                         |
| C(2)  | 14822(7)  | 9645(15)  | 8505(10) | 27(3)                         |
| C(3)  | 8327(6)   | 6653(12)  | 6177(9)  | 19(2)                         |
| C(4)  | 10000     | 10000     | 8605(16) | 20(5)                         |
| O(1)  | 12598(4)  | 7402(4)   | 5655(7)  | 23(2)                         |
| O(2)  | 7606(4)   | 5211(9)   | 6107(8)  | 31(2)                         |
| O(3)  | 13804(8)  | 9790(8)   | 8964(6)  | 42(2)                         |
| O(4)  | 14586(5)  | 9173(9)   | 7522(7)  | 29(2)                         |
| O(5)  | 9806(6)   | 7401(6)   | 6192(6)  | 24(1)                         |
| Na(3) | 13333     | 6667      | 3293(15) | 95(5)                         |
| O(6)  | 10000     | 10000     | 9581(16) | 45(5)                         |
| O(7)  | 10594(14) | 11190(30) | 8120(20) | 72(17)                        |
| O(8)  | 11160(40) | 10580(20) | 8060(30) | 110(20)                       |

Table S2. Atomic coordinates ( $\times 10^4$ ) and equivalent isotropic displacement parameters ( $\text{\AA}^2 \times 10^3$ ) for  $\text{Na}_2\text{Ca}_2(\text{CO}_3)_3$ .  $U(\text{eq})$  is defined as one third of the trace of the orthogonalized  $U_{ij}$  tensor.

| atom  | x        | Y       | z       | $U_{\text{eq}}(\text{\AA}^2)$ |
|-------|----------|---------|---------|-------------------------------|
| Ca(1) | 0        | 2832(1) | 4979(1) | 12(1)                         |
| Na(1) | -5000    | 5000    | 4293(3) | 16(1)                         |
| Na(2) | 0        | 0       | 6154(3) | 16(1)                         |
| O(1)  | -5000    | 1981(2) | 771(4)  | 19(1)                         |
| O(2)  | -2747(3) | 3457(2) | 2180(3) | 14(1)                         |
| C(1)  | -5000    | 2952(3) | 1720(5) | 11(1)                         |
| O(3)  | 0        | 0       | 437(5)  | 17(1)                         |
| O(4)  | 0        | 1013(2) | 3129(4) | 18(1)                         |
| C(2)  | 0        | 0       | 2273(7) | 11(1)                         |

Table S3. Atomic coordinates ( $\times 10^4$ ) and equivalent isotropic displacement parameters ( $\text{\AA}^2 \times 10^3$ ) for  $\text{Na}_2\text{Ca}(\text{CO}_3)_2$ .  $U(\text{eq})$  is defined as one third of the trace of the orthogonalized  $U_{ij}$  tensor.

| atom  | x       | Y        | z       | $U_{\text{eq}}(\text{\AA}^2)$ |
|-------|---------|----------|---------|-------------------------------|
| Ca(1) | 3784(1) | 2043(1)  | 7229(1) | 15(1)                         |
| Na(1) | 1053(1) | 592(2)   | 5827(1) | 24(1)                         |
| Na(2) | 6486(1) | 594(2)   | 6113(1) | 28(1)                         |
| C(1)  | 3747(2) | -1281(4) | 7216(3) | 14(1)                         |
| C(2)  | 3859(3) | 2530(3)  | 4945(2) | 15(1)                         |
| O(1)  | 4821(2) | -528(3)  | 7168(2) | 21(1)                         |
| O(2)  | 2606(2) | -589(3)  | 7203(2) | 20(1)                         |
| O(3)  | 3761(2) | -2751(3) | 7294(2) | 17(1)                         |
| O(4)  | 4829(2) | 2954(3)  | 5567(2) | 25(1)                         |
| O(5)  | 3593(2) | 3339(3)  | 4096(2) | 27(1)                         |
| O(6)  | 3177(2) | 1374(2)  | 5217(2) | 27(1)                         |

Table S4. Bond lengths ( $\text{\AA}$ ) for  $\text{Na}_6\text{Ca}_5(\text{CO}_3)_8$

|                |           |               |           |
|----------------|-----------|---------------|-----------|
| Ca(1)-O(6)#1   | 2.266(19) | C(2)-O(4)     | 1.306(15) |
| Ca(1)-O(8)     | 2.35(4)   | C(2)-Ca(3)#16 | 2.828(13) |
| Ca(1)-O(8)#2   | 2.35(4)   | C(2)-Na(1)#10 | 2.884(8)  |
| Ca(1)-O(8)#3   | 2.35(4)   | C(3)-O(2)     | 1.261(13) |
| Ca(1)-O(7)     | 2.43(3)   | C(3)-O(5)#4   | 1.290(7)  |
| Ca(1)-O(7)#3   | 2.43(3)   | C(3)-O(5)     | 1.290(7)  |
| Ca(1)-O(7)#2   | 2.43(3)   | C(3)-Ca(3)#17 | 2.929(6)  |
| Ca(1)-O(5)#4   | 2.537(5)  | C(4)-O(7)#2   | 1.20(3)   |
| Ca(1)-O(5)#3   | 2.537(5)  | C(4)-O(7)#3   | 1.20(3)   |
| Ca(1)-O(5)#2   | 2.537(5)  | C(4)-O(7)     | 1.20(3)   |
| Ca(1)-O(5)#5   | 2.537(5)  | C(4)-O(8)#3   | 1.22(4)   |
| Ca(1)-O(5)     | 2.537(5)  | C(4)-O(8)#2   | 1.22(4)   |
| Ca(2)-O(1)     | 2.365(9)  | C(4)-O(8)     | 1.22(4)   |
| Ca(2)-O(3)#6   | 2.381(7)  | C(4)-O(6)     | 1.23(3)   |
| Ca(2)-O(3)#7   | 2.381(7)  | C(4)-Ca(2)#16 | 2.868(10) |
| Ca(2)-O(8)#6   | 2.49(4)   | C(4)-Na(2)#16 | 2.868(10) |
| Ca(2)-O(5)#8   | 2.512(8)  | C(4)-Ca(2)#18 | 2.868(10) |
| Ca(2)-O(5)     | 2.512(8)  | C(4)-Na(2)#18 | 2.868(10) |
| Ca(2)-O(6)#1   | 2.587(5)  | O(1)-Ca(3)#10 | 2.570(2)  |
| Ca(2)-C(4)#1   | 2.868(10) | O(2)-Ca(3)#17 | 2.527(3)  |
| Ca(2)-O(7)#9   | 2.913(19) | O(3)-Na(2)#16 | 2.381(7)  |
| Ca(2)-O(7)#6   | 2.913(19) | O(3)-Ca(2)#16 | 2.381(7)  |
| Ca(2)-Ca(3)    | 3.424(4)  | O(3)-Ca(3)#16 | 2.496(8)  |
| Ca(2)-Ca(3)#10 | 3.424(4)  | O(4)-Ca(3)#10 | 2.375(10) |
| Ca(3)-O(4)#11  | 2.375(10) | O(4)-Na(1)#10 | 2.419(3)  |

|               |           |                |           |
|---------------|-----------|----------------|-----------|
| Ca(3)-O(3)#6  | 2.496(8)  | Na(3)-Na(2)#10 | 3.616(10) |
| Ca(3)-O(3)#12 | 2.496(8)  | Na(3)-Ca(2)#10 | 3.616(10) |
| Ca(3)-O(2)    | 2.527(3)  | Na(3)-Na(2)#11 | 3.616(10) |
| Ca(3)-O(2)#13 | 2.527(3)  | Na(3)-Ca(2)#11 | 3.616(10) |
| Ca(3)-O(1)    | 2.570(2)  | Na(3)-Ca(3)#10 | 4.271(14) |
| Ca(3)-O(1)#11 | 2.570(2)  | Na(3)-Ca(3)#11 | 4.271(14) |
| Ca(3)-O(5)    | 2.582(5)  | Na(3)-Ca(3)#19 | 4.305(15) |
| Ca(3)-O(5)#14 | 2.582(5)  | Na(3)-Ca(3)#1  | 4.305(15) |
| Ca(3)-C(2)#6  | 2.828(13) | O(6)-Ca(1)#16  | 2.266(19) |
| Ca(3)-C(3)    | 2.929(6)  | O(6)-Na(2)#18  | 2.587(5)  |
| Ca(3)-C(3)#13 | 2.929(6)  | O(6)-Ca(2)#16  | 2.587(5)  |
| Na(1)-O(7)#3  | 2.31(2)   | O(6)-Na(2)#16  | 2.587(5)  |
| Na(1)-O(4)    | 2.419(3)  | O(6)-Ca(2)#18  | 2.587(5)  |
| Na(1)-O(4)#11 | 2.419(3)  | O(6)-Ca(2)#20  | 2.587(5)  |
| Na(1)-O(5)    | 2.448(7)  | O(6)-Na(2)#20  | 2.587(5)  |
| Na(1)-O(5)#8  | 2.448(7)  | O(7)-O(8)#2    | 1.03(2)   |
| Na(1)-O(3)    | 2.590(8)  | O(7)-O(8)      | 1.03(2)   |
| Na(1)-O(3)#8  | 2.590(8)  | O(7)-O(7)#2    | 1.79(4)   |
| Na(1)-O(1)    | 2.685(9)  | O(7)-O(7)#3    | 1.79(4)   |
| Na(1)-C(2)    | 2.884(8)  | O(7)-Na(1)#2   | 2.31(2)   |
| Na(1)-C(2)#11 | 2.884(8)  | O(7)-Ca(2)#16  | 2.913(19) |
| Na(1)-O(8)#3  | 2.930(14) | O(7)-Na(2)#16  | 2.913(19) |
| Na(1)-O(8)    | 2.930(13) | O(7)-Na(2)#20  | 2.913(19) |
| C(1)-O(1)     | 1.283(6)  | O(7)-Ca(2)#20  | 2.913(19) |
| C(1)-O(1)#11  | 1.283(7)  | O(8)-O(7)#3    | 1.03(2)   |
| C(1)-O(1)#10  | 1.283(7)  | O(8)-O(8)#3    | 1.75(6)   |
| C(1)-Ca(3)#10 | 2.957(2)  | O(8)-O(8)#2    | 1.75(6)   |
| C(1)-Ca(3)#11 | 2.957(2)  | O(8)-Na(2)#16  | 2.49(4)   |
| C(1)-Na(3)    | 3.00(3)   | O(8)-Ca(2)#16  | 2.49(4)   |
| C(2)-O(3)#15  | 1.249(9)  | O(8)-Na(1)#2   | 2.930(13) |
| C(2)-O(3)     | 1.249(9)  |                |           |

Symmetry transformations used to generate equivalent atoms:

- #1  $x-y+1, x, z-1/2$     #2  $-y+2, x-y+1, z$   
#3  $-x+y+1, -x+2, z$     #4  $-x+y+1, y, z$     #5  $x, x-y+1, z$   
#6  $y, -x+y+1, z-1/2$     #7  $x-y+1, -y+2, z-1/2$   
#8  $-y+2, -x+2, z$     #9  $-x+2, -y+2, z-1/2$   
#10  $-x+y+2, -x+2, z$     #11  $-y+2, x-y, z$   
#12  $y, x-1, z-1/2$     #13  $-x+y+1, -x+1, z$   
#14  $x, x-y, z$     #15  $-x+y+2, y, z$     #16  $x-y+1, x, z+1/2$   
#17  $-y+1, x-y, z$     #18  $y, -x+y+1, z+1/2$   
#19  $-x+2, -y+1, z-1/2$     #20  $-x+2, -y+2, z+1/2$

Table S5. Bond lengths (Å) for Na<sub>2</sub>Ca<sub>2</sub>(CO<sub>3</sub>)<sub>3</sub>

|             |          |
|-------------|----------|
| O(1)-C(1)   | 1.269(4) |
| O(2)-C(1)   | 1.295(3) |
| C(1)-O(2)#1 | 1.295(3) |
| O(3)-C(2)   | 1.308(6) |
| O(4)-C(2)   | 1.277(4) |
| C(2)-O(4)#2 | 1.277(4) |

Symmetry transformations used to generate equivalent atoms:

#1 -x-1,y,z    #2 -x,-y,z

Table S6. Bond lengths (Å) for Na<sub>2</sub>Ca(CO<sub>3</sub>)<sub>2</sub>

|               |            |                |            |
|---------------|------------|----------------|------------|
| Ca(1)-O(5)#1  | 2.315(2)   | Na(2)-Ca(1)#10 | 3.3229(15) |
| Ca(1)-O(4)    | 2.422(2)   | Na(2)-Na(1)#9  | 3.580(2)   |
| Ca(1)-O(1)    | 2.479(2)   | Na(2)-Ca(1)#11 | 3.7189(17) |
| Ca(1)-O(2)#2  | 2.498(2)   | Na(2)-Na(1)#10 | 3.766(2)   |
| Ca(1)-O(3)#3  | 2.5396(17) | C(1)-O(1)      | 1.265(3)   |
| Ca(1)-O(3)#2  | 2.5629(17) | C(1)-O(3)      | 1.289(4)   |
| Ca(1)-O(2)    | 2.589(2)   | C(1)-O(2)      | 1.296(3)   |
| Ca(1)-O(6)    | 2.601(2)   | C(1)-Ca(1)#5   | 2.934(3)   |
| Ca(1)-O(1)#3  | 2.649(2)   | C(1)-Ca(1)#11  | 2.959(3)   |
| Ca(1)-C(2)    | 2.826(3)   | C(2)-O(6)      | 1.266(3)   |
| Ca(1)-C(1)    | 2.908(4)   | C(2)-O(5)      | 1.284(3)   |
| Ca(1)-C(1)#2  | 2.934(3)   | C(2)-O(4)      | 1.290(3)   |
| Na(1)-O(3)#2  | 2.314(3)   | C(2)-Na(1)#2   | 2.889(3)   |
| Na(1)-O(6)    | 2.361(2)   | C(2)-Na(1)#8   | 2.905(3)   |
| Na(1)-O(4)#4  | 2.456(2)   | C(2)-Na(2)#9   | 3.044(3)   |
| Na(1)-O(4)#5  | 2.492(3)   | O(1)-Ca(1)#11  | 2.649(2)   |
| Na(1)-O(2)    | 2.515(3)   | O(1)-Na(1)#10  | 2.915(3)   |
| Na(1)-O(5)#4  | 2.643(3)   | O(2)-Ca(1)#5   | 2.498(2)   |
| Na(1)-C(2)#5  | 2.889(3)   | O(2)-Na(2)#6   | 2.564(3)   |
| Na(1)-C(2)#4  | 2.905(3)   | O(3)-Na(1)#5   | 2.314(3)   |
| Na(1)-O(5)#5  | 2.914(3)   | O(3)-Na(2)#11  | 2.439(3)   |
| Na(1)-O(1)#6  | 2.915(3)   | O(3)-Ca(1)#11  | 2.5396(17) |
| Na(1)-Na(1)#7 | 3.104(3)   | O(3)-Ca(1)#5   | 2.5629(17) |
| Na(2)-O(5)#8  | 2.327(2)   | O(4)-Na(1)#8   | 2.456(2)   |
| Na(2)-O(1)    | 2.329(3)   | O(4)-Na(1)#2   | 2.492(3)   |
| Na(2)-O(6)#9  | 2.392(3)   | O(5)-Ca(1)#12  | 2.315(2)   |
| Na(2)-O(3)#3  | 2.439(3)   | O(5)-Na(2)#4   | 2.327(2)   |
| Na(2)-O(2)#10 | 2.564(3)   | O(5)-Na(1)#8   | 2.643(3)   |
| Na(2)-O(4)    | 2.734(3)   | O(5)-Na(1)#2   | 2.914(3)   |
| Na(2)-C(2)#9  | 3.044(3)   | O(6)-Na(2)#9   | 2.392(3)   |

**Table S7. The contribution of different geometrical factors (g) for structure factors (C)**

| Crystals(n)                                      | $g_{311/n}$ | $g_{322/n}$ | $g_{333/n}$ |
|--------------------------------------------------|-------------|-------------|-------------|
| $\text{Na}_6\text{Ca}_5(\text{CO}_3)_8$<br>(n=2) | 0.133       | -           | 0.196       |
| $\text{Na}_2\text{Ca}_2(\text{CO}_3)_3$<br>(n=2) | 0.355       | 0.079       | 0.434       |

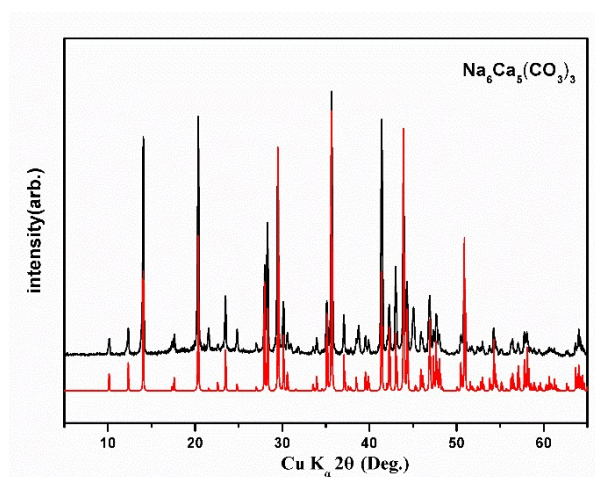

(a)

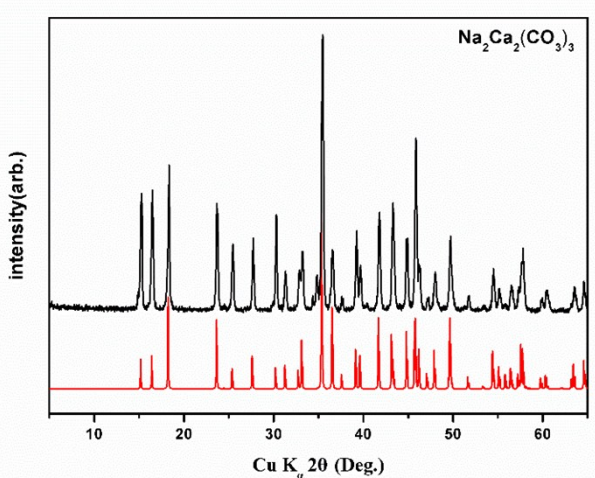

(b)

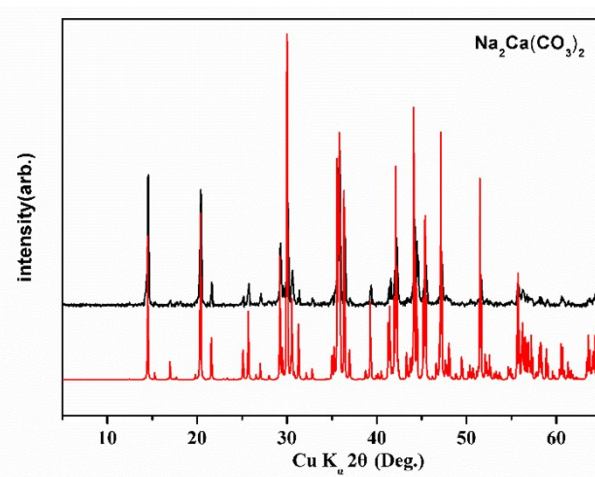

(c)

Figure S1. X-ray powder diffraction patterns of  $\text{Na}_6\text{Ca}_5(\text{CO}_3)_8$ ,  $\text{Na}_2\text{Ca}_2(\text{CO}_3)_3$  and  $\text{Na}_2\text{Ca}(\text{CO}_3)_2$   
(**black colour** is crystal sample; **red colour** is simulation results)

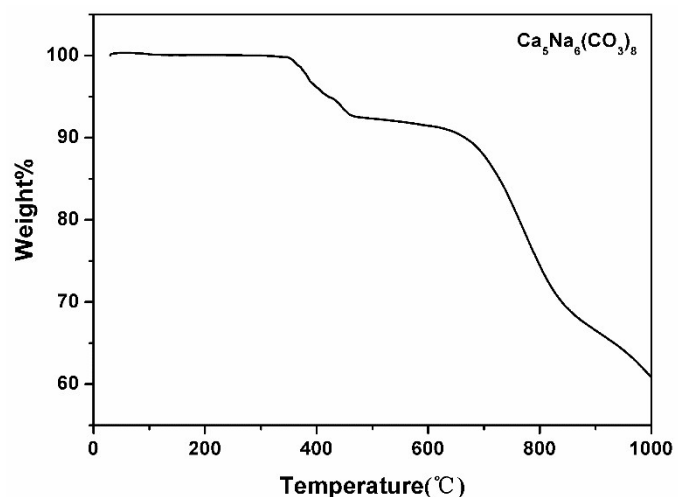

(a)

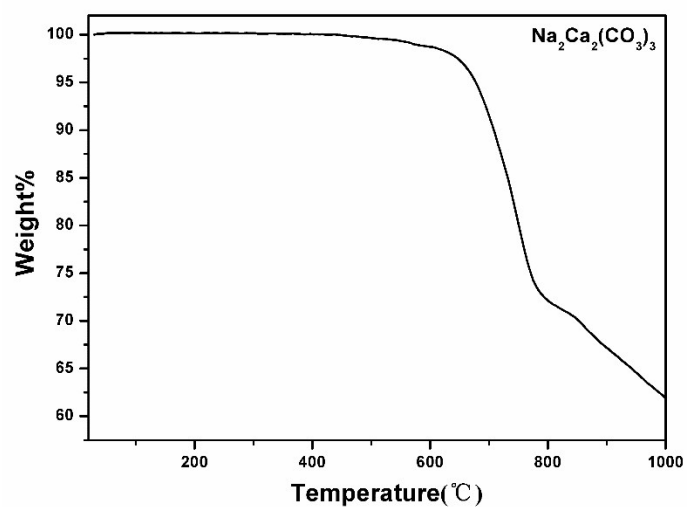

(b)

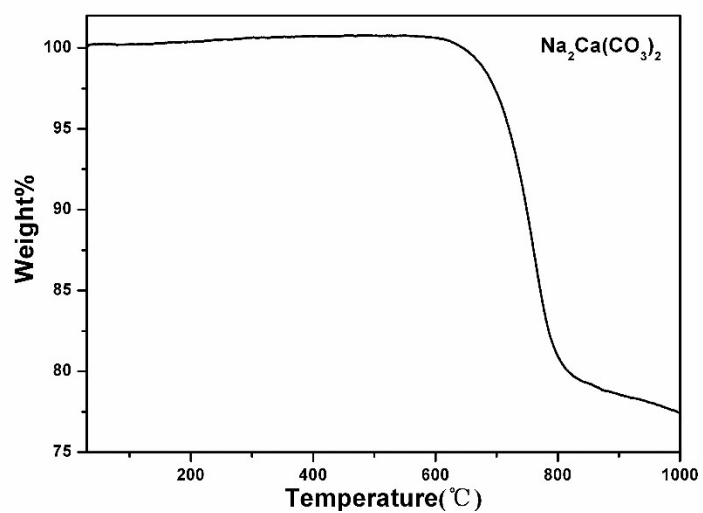

(c)

Figure S2. TG curves of (a)  $\text{Na}_6\text{Ca}_5(\text{CO}_3)_8$ , (b)  $\text{Na}_2\text{Ca}_2(\text{CO}_3)_3$  and (c)  $\text{Na}_2\text{Ca}(\text{CO}_3)_2$ .



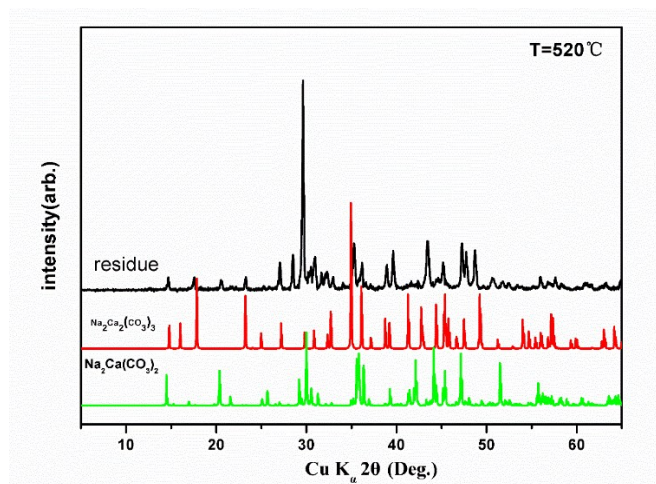

Figure S3. X-ray powder diffraction patterns of  $\text{Na}_6\text{Ca}_5(\text{CO}_3)_8$  at  $520^\circ\text{C}$ .

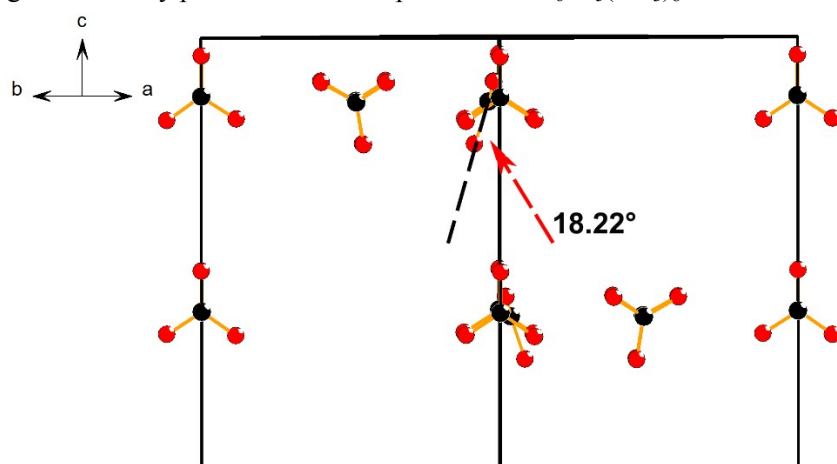

Figure S4. The standing-on-edge  $[\text{CO}_3]^{2-}$  groups in  $\text{Na}_6\text{Ca}_5(\text{CO}_3)_8$

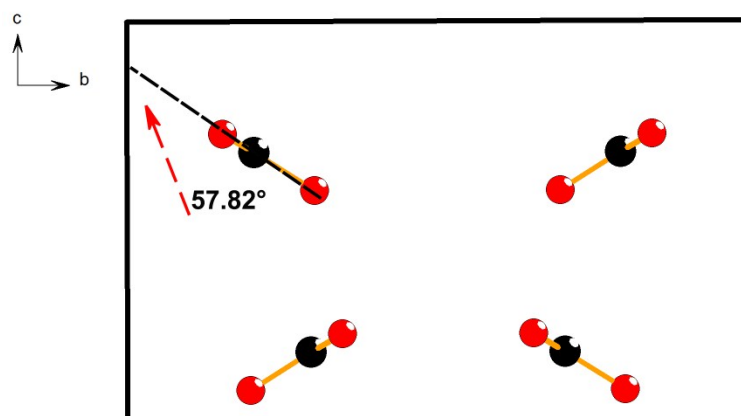

Figure S5. The standing-on-edge  $[\text{CO}_3]^{2-}$  groups in  $\text{Na}_2\text{Ca}_2(\text{CO}_3)_3$

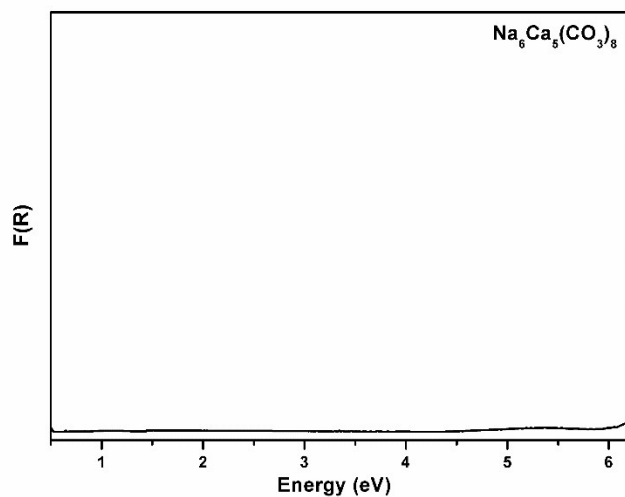

(a)

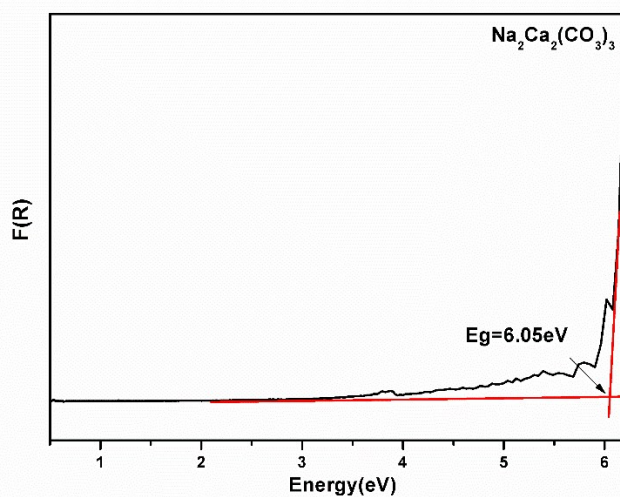

(b)

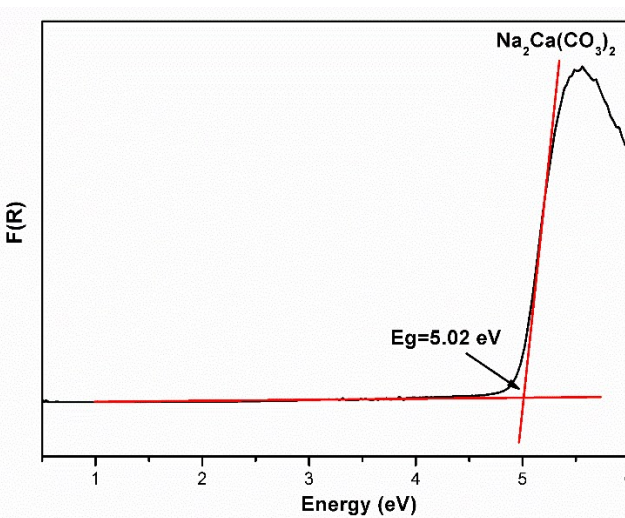

(c)

Figure S6 Diffuse reflectance absorption curves of the powder samples of (a)  $\text{Na}_6\text{Ca}_5(\text{CO}_3)_8$ , (b)  $\text{Na}_2\text{Ca}_2(\text{CO}_3)_3$  and (c)  $\text{Na}_2\text{Ca}(\text{CO}_3)_2$

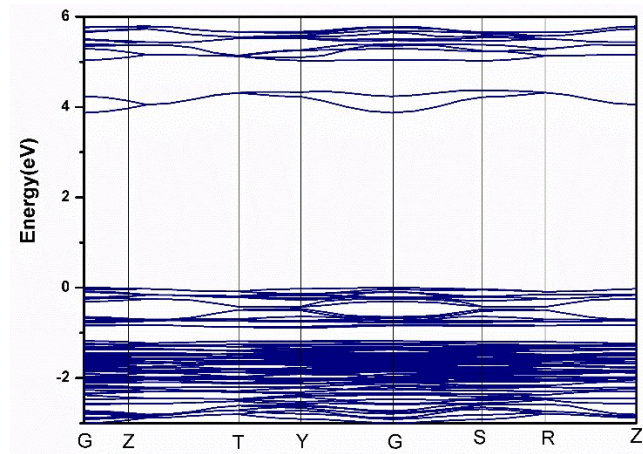

(a)

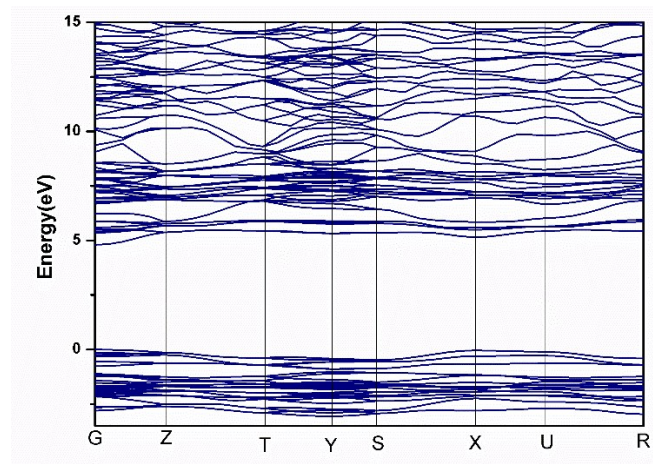

(b)

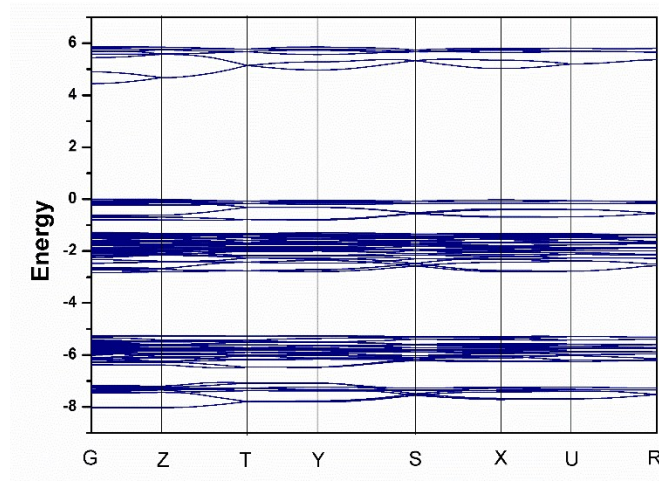

(c)

Figure S7. The calculated band structures for (a)  $\text{Na}_6\text{Ca}_5(\text{CO}_3)_8$ , (b)  $\text{Na}_2\text{Ca}_2(\text{CO}_3)_3$  and (c)  $\text{Na}_2\text{Ca}(\text{CO}_3)_2$

## The Anionic Group Theory Calculation.

The macroscopic second-order susceptibility  $\chi^{(2)}$  could be expressed by Eq. 3 according to the anionic group theory.

$$\chi_{ijk}^{(2)} = \frac{F}{V} \sum_p \sum_{i'j'k'} \alpha_{ii'} \alpha_{jj'} \alpha_{kk'} \beta_{ij'k}^{(2)}(P), \quad (1)$$

where F is the correction factor of the localized field, V is the volume of the unit cell,  $\alpha_{ii'}$ ,  $\alpha_{jj'}$ , and  $\alpha_{kk'}$  are the direction cosines between the macroscopic coordinates axes of the crystal and the microscopic coordinates axes of  $[\text{CO}_3]$  or  $[\text{BO}_3]$  groups, and  $\beta_{ij'k}^{(2)}$  is the microscopic second-order susceptibility tensors of an individual group, which can be calculated with quantum chemistry method.

Because  $[\text{CO}_3]$  and  $[\text{BO}_3]$  is a planar group in point group  $D_{3h}$ , in the Kleinman approximation, there are only two nonvanishing second-order susceptibility  $\beta_{111}^{(2)} = -\beta_{122}^{(2)}$ . The geometrical factor, g, could be derived from Eq. (1). and Eq. (2) could be simplified according to the deduction process<sup>44</sup>:

$$\chi_{ijk}^{(2)} = \frac{F}{V} \cdot g_{ijk} \cdot \beta_{111}^{(2)} \quad (2)$$

$$g = \max(g_{ijk}); (i,j,k=1,2,3) \quad (3)$$

In case of unspontaneous polarization, the structural criterion C is defined as:

$$C = \frac{g}{n} \quad (4)$$

where n is the number of anionic groups in a unit cell.
